# Supplementary material for: Elimination of transforming activity and gene degradation during UV and UV/H2O2 treatment of plasmid-encoded antibiotic resistance genes
Source: Royal Society of Chemistry journal article supplement (doi:10.1039/c8ew00200b), 2018-01-01
Supplement: c8ew00200b1.pdf [file c8ew00200b1.pdf]

## Supporting Information

### **Elimination of transforming activity and gene degradation during UV and UV/H<sub>2</sub>O<sub>2</sub> treatment of plasmid-encoded antibiotic resistance genes**

Younggun Yoon<sup>1</sup>, Michael C. Dodd<sup>2</sup>, Yunho Lee<sup>1\*</sup>

<sup>1</sup>School of Earth Sciences and Environmental Engineering, Gwangju Institute of Science and  
Technology (GIST), Gwangju 61005, Republic of Korea

<sup>2</sup>Department of Civil and Environmental Engineering, University of Washington, Seattle, WA  
98195, USA

\*Corresponding Author: Yunho Lee; Phone: 82-62-715-2468; Fax: 82-62-715-2434; Email:  
[yhlee42@gist.ac.kr](mailto:yhlee42@gist.ac.kr)

**Submitted to Environmental Science: Water Research & Technology**

## 24 **SI-Text-1. Standards and reagents**

25 The following chemicals were purchased from various suppliers and used as received:  
26 acetonitrile (A998SK, Fisher), agar powder (A1296, Sigma), atrazine (45330, Sigma), ampicillin  
27 sodium salt (A0166, Sigma), calcium chloride dihydrate (C7902, Sigma), copper sulfate  
28 pentahydrate (209198, Sigma), ethylenediaminetetracetic acid (E6758, sigma), glycerol (G5516,  
29 Sigma), hydrogen peroxide solution (216763, Sigma), magnesium chloride (M8266, Sigma),  
30 methanol (A452SK, Fisher), phosphoric acid solution (W290017, Sigma), peroxidase from  
31 horseradish (P6782, Sigma), potassium iodide (28624, Duksan), sodium chloride (S7653, Sigma),  
32 sodium hydroxide solution (415413, Sigma), sodium phosphate monobasic dihydrate (71505,  
33 Sigma), sodium phosphate dibasic dihydrate (30435, Sigma), sulfuric acid (320001, Sigma),  
34 tryptone (1612, Conda), and yeast extract (1702, Conda). Stock solutions of hydrogen peroxide  
35 ( $\text{H}_2\text{O}_2$ ) were prepared by diluting  $\text{H}_2\text{O}_2$  commercial solution (30%) and standardized  
36 spectrophotometrically using the molar absorption coefficient,  $\epsilon = 40 \text{ M}^{-1} \text{ cm}^{-1}$  at 240 nm for  $\text{H}_2\text{O}_2$   
37 (1).

## 39 **SI-Text-2. Preparation of antibiotic-resistant *E. coli***

40 *E. coli* DH5 $\alpha$  was inoculated from freshly streaked overnight LB agar plates into 5 mL of LB  
41 broth containing 50  $\mu\text{g/mL}$  of ampicillin, which was grown at 37°C for 12 h to the stationary phase.  
42 One-hundred  $\mu\text{L}$  of the cultured solution were transferred into 5 mL of LB broth containing 50  
43  $\mu\text{g/mL}$  of ampicillin, and incubated for 6 h to reach mid-exponential phase as determined by  
44 monitoring the solution absorbance at  $\lambda$  of 600 nm. The *E. coli* cells were then washed by  
45 centrifuging at 8,000 rpm for 2 min, discarding the broth and rinsing three times with 1 mM of  
46 phosphate-buffered solution (PB, pH 7), and re-suspended in 1 mM of the PB solution. The *E. coli*  
47 cell concentration in these primary stocks was in the range of  $\sim 10^9$  CFU/ml, which was determined

48 by a plate count method (LB agar) with serial dilution of samples.

49

### 50 **SI-Text-3. Preparation of competent *E. coli***

51 Non-resistant *E. coli* DH5α was inoculated from freshly streaked overnight LB agar plates into  
52 5 mL of LB broth, and grown at 37°C for 12 h to the stationary phase. One-hundred μL of the  
53 cultured solution were transferred into 10 mL of LB broth in a test tube, and incubated for 4 hrs to  
54 reach mid-exponential phase as determined by monitoring solution absorbance at λ of 600 nm.  
55 When the OD<sub>600nm</sub> reached 0.7 – 0.8 (~7×10<sup>8</sup> CFU/ml), the culture tube was stored on ice for 30  
56 min. The *E. coli* cells were then centrifuged at 8,000 rpm for 5 min at 4°C. The supernatant was  
57 discarded and pellets were gently resuspended in 250 μL of ice-cold Buffer I solution (80 mM  
58 MgCl<sub>2</sub> and 20 mM CaCl<sub>2</sub>(H<sub>2</sub>O)) and stored on ice for 30 min. The pellets were recovered by  
59 centrifugation at 8,000 rpm for 5 min at 4°C, after which the supernatant was discarded. This step  
60 was repeated two times. After that, the pellets were gently resuspended in 250 μL of Buffer II  
61 solution (100 mM CaCl<sub>2</sub> with 15 % glycerol). One-hundred μL of the resulting competent cell  
62 suspension was dispensed into 1.5 ml tubes and stored at -80°C until use in transformation assays.

63

64

65

66

67

68

69

70

71

72 Table S1. DNA sequence information for *amp<sup>R</sup>* and *ori* amplicons located in pUC19.<sup>a</sup>

|                                    |                       |                                                                                                                                                                                                                                                                                                                                                                                                                                                                                                                                                                                                                                                                                       |
|------------------------------------|-----------------------|---------------------------------------------------------------------------------------------------------------------------------------------------------------------------------------------------------------------------------------------------------------------------------------------------------------------------------------------------------------------------------------------------------------------------------------------------------------------------------------------------------------------------------------------------------------------------------------------------------------------------------------------------------------------------------------|
| <i>amp<sup>R</sup></i><br>(192 bp) | Sequence              | GTATTCAACATTTCCGTGTCGCCCTTATTCCCTTTTTTGCGG<br>CATTTTGCCTTCCTGTTTTTGCTCACCCAGAAACGCTGGTGA<br>AAGTAAAAGATGCTGAAGATCAGTTGGGTGCACGAGTGGG<br>TTACATCGAACTGGATCTCAACAGCGGTAAGATCCTTGAGA<br>GTTTTCGCCCCGAAGAACGTTTTCCAA                                                                                                                                                                                                                                                                                                                                                                                                                                                                      |
|                                    | Base number           | A = 44, T = 59, G = 44, C = 45                                                                                                                                                                                                                                                                                                                                                                                                                                                                                                                                                                                                                                                        |
|                                    | Base pair content (%) | A-T base pairs = 103 (53.6%), G-C base pairs = 89 (46.4%)                                                                                                                                                                                                                                                                                                                                                                                                                                                                                                                                                                                                                             |
| <i>amp<sup>R</sup></i><br>(400 bp) | Sequence              | GTATTCAACATTTCCGTGTCGCCCTTATTCCCTTTTTTGCGG<br>CATTTTGCCTTCCTGTTTTTGCTCACCCAGAAACGCTGGTGA<br>AAGTAAAAGATGCTGAAGATCAGTTGGGTGCACGAGTGGG<br>TTACATCGAACTGGATCTCAACAGCGGTAAGATCCTTGAGA<br>GTTTTCGCCCCGAAGAACGTTTTCCAATGATGAGCACTTTT<br>AAAGTTCTGCTATGTGGCGCGGTATTATCCCGTATTGACGC<br>CGGGCAAGAGCAACTCGGTGCGCCGCATACACTATTCTCAG<br>AATGACTTGGTTGAGTACTCACCAGTCACAGAAAAGCATCT<br>TACGGATGGCATGACAGTAAGAGAATTATGCAGTGCTGCC<br>ATAACCATGAGTGATAACACTGCGGCCAACTT                                                                                                                                                                                                                                 |
|                                    | Base number           | A = 102, T = 111, G = 94, C = 93                                                                                                                                                                                                                                                                                                                                                                                                                                                                                                                                                                                                                                                      |
|                                    | Base pair content (%) | A-T base pairs = 213 (53.3%), G-C base pairs = 187 (46.7%)                                                                                                                                                                                                                                                                                                                                                                                                                                                                                                                                                                                                                            |
| <i>amp<sup>R</sup></i><br>(603 bp) | Sequence              | GTATTCAACATTTCCGTGTCGCCCTTATTCCCTTTTTTGCGG<br>CATTTTGCCTTCCTGTTTTTGCTCACCCAGAAACGCTGGTGA<br>AAGTAAAAGATGCTGAAGATCAGTTGGGTGCACGAGTGGG<br>TTACATCGAACTGGATCTCAACAGCGGTAAGATCCTTGAGA<br>GTTTTCGCCCCGAAGAACGTTTTCCAATGATGAGCACTTTT<br>AAAGTTCTGCTATGTGGCGCGGTATTATCCCGTATTGACGC<br>CGGGCAAGAGCAACTCGGTGCGCCGCATACACTATTCTCAG<br>AATGACTTGGTTGAGTACTCACCAGTCACAGAAAAGCATCT<br>TACGGATGGCATGACAGTAAGAGAATTATGCAGTGCTGCC<br>ATAACCATGAGTGATAACACTGCGGCCAACTTACTTCTGAC<br>AACGATCGGAGGACCGAAGGAGCTAACCGCTTTTTTGCAC<br>AACATGGGGGATCATGTAACCTCGCCTTGATCGTTGGGAACC<br>GGAGCTGAATGAAGCCATACCAAACGACGAGCGTGACACC<br>ACGATGCCTGTAGCAATGGCAACAACGTTGCGCAAACCTAT<br>TAACTGGCGAACTACTTACTTAGCTTCCCGGC |
|                                    | Base number           | A = 159, T = 153, G = 144, C = 147                                                                                                                                                                                                                                                                                                                                                                                                                                                                                                                                                                                                                                                    |
|                                    | Base pair content (%) | A-T base pairs = 312 (51.7%), G-C base pairs = 291 (48.3%)                                                                                                                                                                                                                                                                                                                                                                                                                                                                                                                                                                                                                            |
| <i>amp<sup>R</sup></i><br>(851 bp) | Sequence              | GTATTCAACATTTCCGTGTCGCCCTTATTCCCTTTTTTGCGG<br>CATTTTGCCTTCCTGTTTTTGCTCACCCAGAAACGCTGGTGA<br>AAGTAAAAGATGCTGAAGATCAGTTGGGTGCACGAGTGGG<br>TTACATCGAACTGGATCTCAACAGCGGTAAGATCCTTGAGA<br>GTTTTCGCCCCGAAGAACGTTTTCCAATGATGAGCACTTTT                                                                                                                                                                                                                                                                                                                                                                                                                                                        |

|                       |                       |                                                                                                                                                                                                                                                                                                                                                                                                                                                                                                                                                                                                                                                                                                                                      |
|-----------------------|-----------------------|--------------------------------------------------------------------------------------------------------------------------------------------------------------------------------------------------------------------------------------------------------------------------------------------------------------------------------------------------------------------------------------------------------------------------------------------------------------------------------------------------------------------------------------------------------------------------------------------------------------------------------------------------------------------------------------------------------------------------------------|
|                       |                       | AAAGTTCTGCTATGTGGCGCGGTATTATCCCGTATTGACGC<br>CGGGCAAGAGCAACTCGGTGCGCCGCATACACTATTCTCAG<br>AATGACTTGGTTGAGTACTCACCAGTCACAGAAAAGCATCT<br>TACGGATGGCATGACAGTAAGAGAATTATGCAGTGCTGCC<br>ATAACCATGAGTGATAACACTGCGGCCAACTTACTTCTGAC<br>AACGATCGGAGGACCGAAGGAGCTAACCGCTTTTTTGCAC<br>AACATGGGGGATCATGTAACCTCGCCTTGATCGTTGGGAACC<br>GGAGCTGAATGAAGCCATACCAAACGACGAGCGTGACACC<br>ACGATGCCTGTAGCAATGGCAACAACGTTGCGCAAACCTAT<br>TAACTGGCGAACTACTTACTCTAGCTTCCCGGCAACAATTA<br>ATAGACTGGATGGAGGCGGATAAAGTTGCAGGACCACTTC<br>TGCGCTCGGCCCTTCCGGCTGGCTGGTTTATTGCTGATAAA<br>TCTGGAGCCGGTGAGCGTGGGTCTCGCGGTATCATTGCAGC<br>ACTGGGGCCAGATGGTAAGCCCTCCCGTATCGTAGTTATCT<br>ACACGACGGGGAGTCAGGCAACTATGGATGAACGAAATAG<br>ACAGATCGCTGAGATAGGTGCCTCACTGATTAAGCAT |
|                       | Base number           | A = 220, T = 211, G = 218, C = 202                                                                                                                                                                                                                                                                                                                                                                                                                                                                                                                                                                                                                                                                                                   |
|                       | Base pair content (%) | A-T base pairs = 431 (50.6%), G-C base pairs = 420 (49.4%)                                                                                                                                                                                                                                                                                                                                                                                                                                                                                                                                                                                                                                                                           |
| <i>ori</i><br>(190bp) | Sequence              | GCGTAATCTGCTGCTTGCAAACAAAAAAACCACCGCTACC<br>AGCGGTGGTTTGTGTTGCCGGATCAAGAGCTACCAACTCTTT<br>TTCCGAAGGTAAGTGGCTTCAGCAGAGCGCAGATACCAA<br>TACTGTTCTTCTAGTGTAGCCGTAGTTAGGCCACCACTTCA<br>AGAACTCTGTAGCACCGCCTACATACCT                                                                                                                                                                                                                                                                                                                                                                                                                                                                                                                       |
|                       | Base number           | A = 51, T = 47, G = 40, C = 54                                                                                                                                                                                                                                                                                                                                                                                                                                                                                                                                                                                                                                                                                                       |
|                       | Base pair content (%) | A-T base pairs = 98 (51.6%), G-C base pairs = 94 (48.4%)                                                                                                                                                                                                                                                                                                                                                                                                                                                                                                                                                                                                                                                                             |
| <i>ori</i><br>(390bp) | Sequence              | GCGTAATCTGCTGCTTGCAAACAAAAAAACCACCGCTACC<br>AGCGGTGGTTTGTGTTGCCGGATCAAGAGCTACCAACTCTTT<br>TTCCGAAGGTAAGTGGCTTCAGCAGAGCGCAGATACCAA<br>TACTGTTCTTCTAGTGTAGCCGTAGTTAGGCCACCACTTCA<br>AGAACTCTGTAGCACCGCCTACATACCTCGCTCTGCTAATC<br>CTGTTACCAGTGGCTGCTGCCAGTGGCGATAAGTCGTGTCT<br>TACCGGGTTGGACTCAAGACGATAGTTACCGGATAAGGCG<br>CAGCGGTCGGGCTGAACGGGGGGTTCGTGCACACAGCCCA<br>GCTTGGAGCGAACGACCTACACCGAACTGAGATACCTACA<br>GCGTGAGCTATGAGAAAGCGCCACGC                                                                                                                                                                                                                                                                                           |
|                       | Base number           | A = 97, T = 85, G = 101, C = 107                                                                                                                                                                                                                                                                                                                                                                                                                                                                                                                                                                                                                                                                                                     |
|                       | Base pair content (%) | A-T base pairs = 182 (46.6%), G-C base pairs = 208 (53.4%)                                                                                                                                                                                                                                                                                                                                                                                                                                                                                                                                                                                                                                                                           |
| <i>ori</i><br>(530bp) | Sequence              | GCGTAATCTGCTGCTTGCAAACAAAAAAACCACCGCTACC<br>AGCGGTGGTTTGTGTTGCCGGATCAAGAGCTACCAACTCTTT<br>TTCCGAAGGTAAGTGGCTTCAGCAGAGCGCAGATACCAA<br>TACTGTTCTTCTAGTGTAGCCGTAGTTAGGCCACCACTTCA<br>AGAACTCTGTAGCACCGCCTACATACCTCGCTCTGCTAATC<br>CTGTTACCAGTGGCTGCTGCCAGTGGCGATAAGTCGTGTCT                                                                                                                                                                                                                                                                                                                                                                                                                                                             |

|  |                       |                                                                                                                                                                                                                                                                                                                            |
|--|-----------------------|----------------------------------------------------------------------------------------------------------------------------------------------------------------------------------------------------------------------------------------------------------------------------------------------------------------------------|
|  |                       | TACCGGGTTGGACTCAAGACGATAGTTACCGGATAAGGCG<br>CAGCGGTCGGGCTGAACGGGGGGTTCGTGCACACAGCCCA<br>GCTTGGAGCGAACGACCTACACCGAACTGAGATACCTACA<br>GCGTGAGCTATGAGAAAGCGCCACGCTTCCCGAAGGGAGA<br>AAGGCGGACAGGTATCCGGTAAGCGGCAGGGTCGGAACAG<br>GAGAGCGCACGAGGGAGCTTCCAGGGGGAAACGCCTGGTA<br>TCTTTATAGTCCTGTCGGGTTTCGCCACCTCTGACTTGAGCG<br>TCGA |
|  | Base number           | A = 128, T = 111, G = 151, C = 140                                                                                                                                                                                                                                                                                         |
|  | Base pair content (%) | A-T base pairs = 239 (45.1%), G-C base pairs = 291 (54.9%)                                                                                                                                                                                                                                                                 |

<sup>a</sup>The complete genome sequence of pUC19 is available at

<https://www.addgene.org/browse/sequence/74677/>

Table S2. Primers used for qPCR analysis of target *amp<sup>R</sup>* and *ori* amplicons.<sup>a,b</sup>

| Primer                      | Start-end positions in pUC19 plasmid | Target amplicon length (bp) | Sequence                         |
|-----------------------------|--------------------------------------|-----------------------------|----------------------------------|
| <i>amp<sup>R</sup></i> -FP  | 889                                  | -                           | 5' GTA TTC AAC ATT TCC GTG TCG C |
| <i>amp<sup>R</sup></i> -RPa | 1080                                 | 192                         | 5' TTG GAA AAC GTT CTT CGG GG    |
|                             | 1288                                 | 400                         | 5' AAG TTG GCC GCA GTG TTA TC    |
|                             | 1491                                 | 603                         | 5' GCC GGG AAG CTA GAG TAA GT    |
|                             | 1738                                 | 851                         | 5' ATG CTT AAT CAG TGA GGC ACC   |
| <i>ori</i> -FP              | 1936                                 | -                           | 5' GCG TAA TCT GCT GCT TGC A     |
| <i>ori</i> -RP              | 2125                                 | 190                         | 5' AGG TAT GTA GGC GGT GCT AC    |
|                             | 2325                                 | 390                         | 5' GCG TGG CGC TTT CTC ATA G     |
|                             | 2465                                 | 530                         | 5' TCG ACG CTC AAG TCA GAG G     |

<sup>a</sup>FP = forward primer; RP = reverse primer, <sup>b</sup>Primers were designed using the NCBI Primer-BLAST tool.

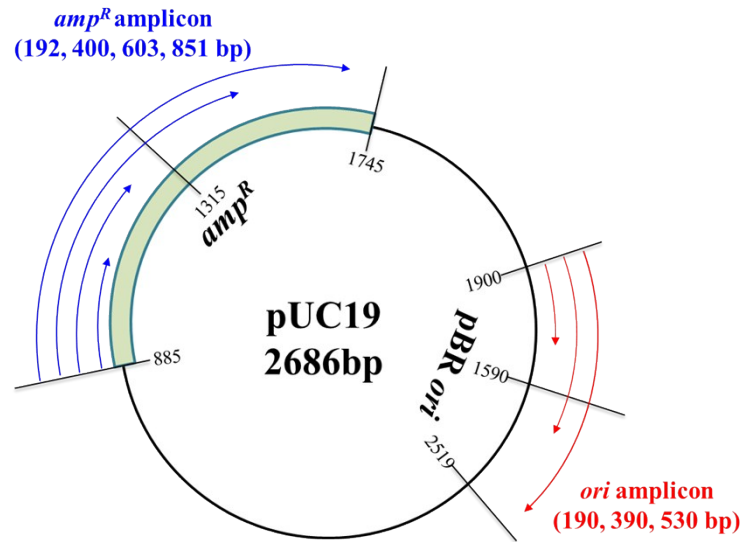

86

87 **Figure S1.** The pUC19 plasmid and the position of the target qPCR amplicons (i.e., 192, 400, 603,  
88 and 851 bps of *amp<sup>R</sup>* gene and 190, 390, and 530 bps of *ori* region).

89

90

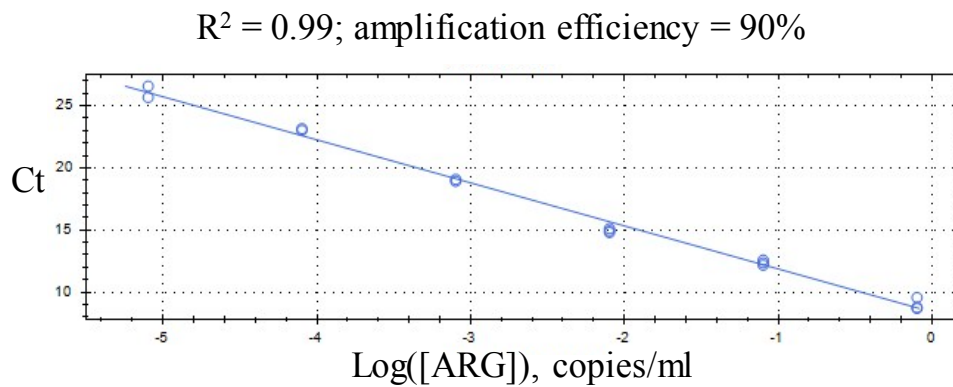

91

92 **Figure S2.** The representative standard curve for a qPCR run with *amp<sup>R</sup>* amplicon (851 bp).  
93 Different concentrations of plasmid DNA were prepared by diluting the prepared primary standards  
94 ( $\sim 10^{12}$  copies/mL) that were quantified by the NanoDrop ND-2000 spectrophotometer.

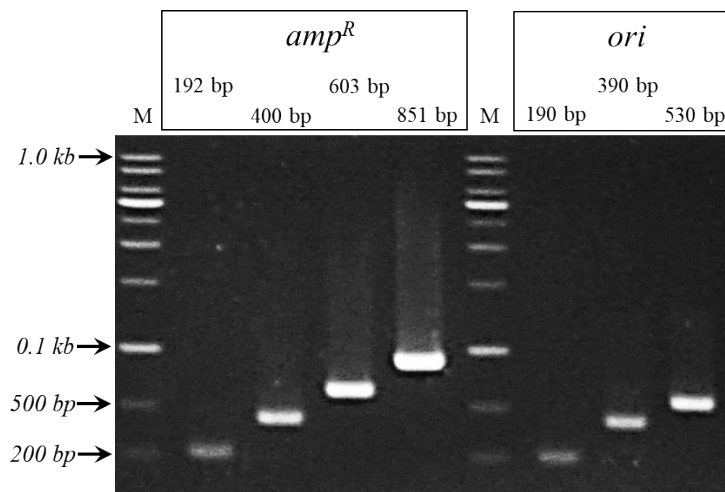

95

96 **Figure S3.** Images of agarose gel electrophoresis for qPCR amplification products of *amp<sup>R</sup>* (192,  
97 400, 603, and 851 bp) and *ori* (190, 390, and 530 bp). The lane ‘M’ shows the standard MW markers.

98

99

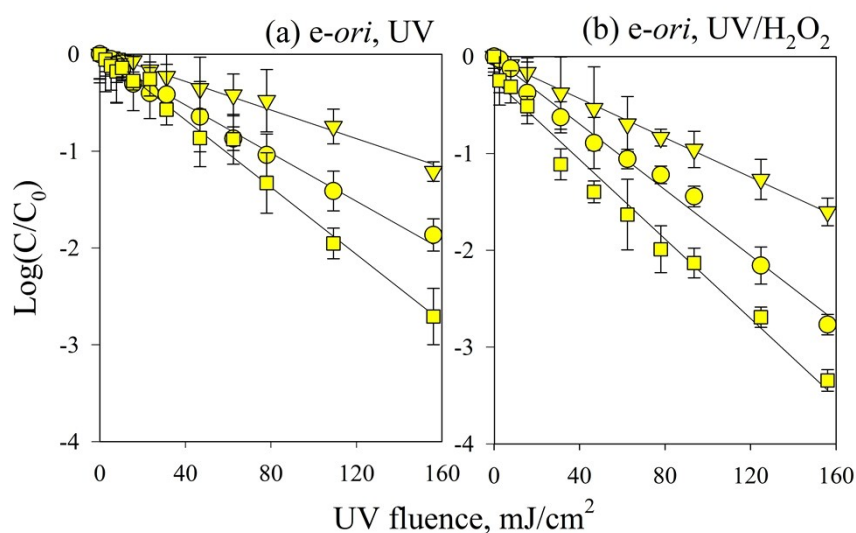

100

101 **Figure S4.** Logarithmic relative concentrations of *ori* amplicons as a function of UV fluence,  
102 measured by qPCR (190 (▼), 390 (●), and 530 (■) base pair amplicons) during treatment of  
103 extracellular pUC19 at pH 7 with (a) UV and (b) UV/H<sub>2</sub>O<sub>2</sub> ([H<sub>2</sub>O<sub>2</sub>]<sub>0</sub> = 10 mg/L). The symbols  
104 represent the measured data and the error bars represent one standard deviation from triplicate  
105 experiments. The lines are linear regressions of the data.

106



107

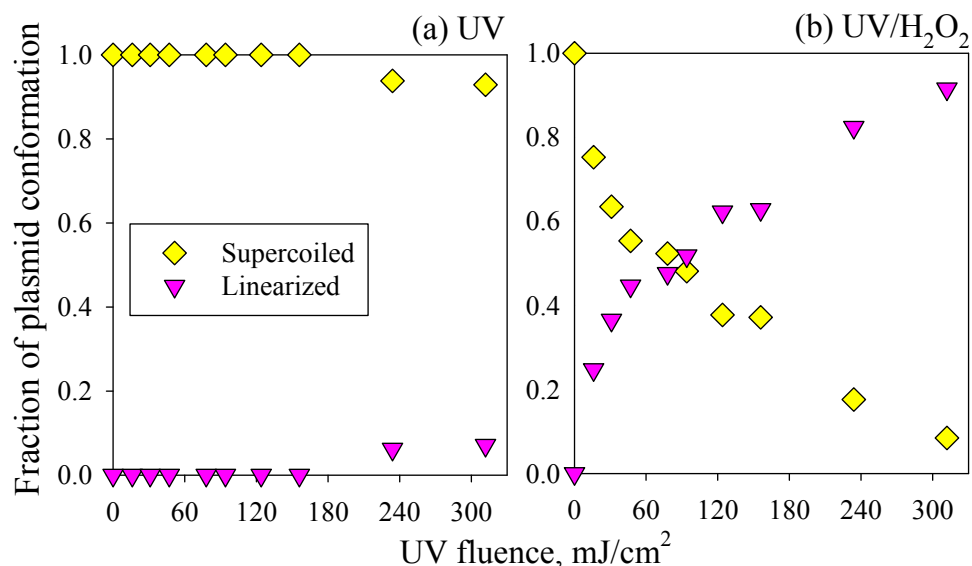

108

109 **Figure S5.** Conformational changes of extracellular plasmid pUC19 during UV and UV/H<sub>2</sub>O<sub>2</sub>  
 110 ([H<sub>2</sub>O<sub>2</sub>]<sub>0</sub> = 10 mg/L) treatment. The fractions of supercoiled and linearized forms of pUC19 were  
 111 quantified from image analysis of the agarose gel electrophoresis data (Figure 3), using the method  
 112 of described in (2).

113

114

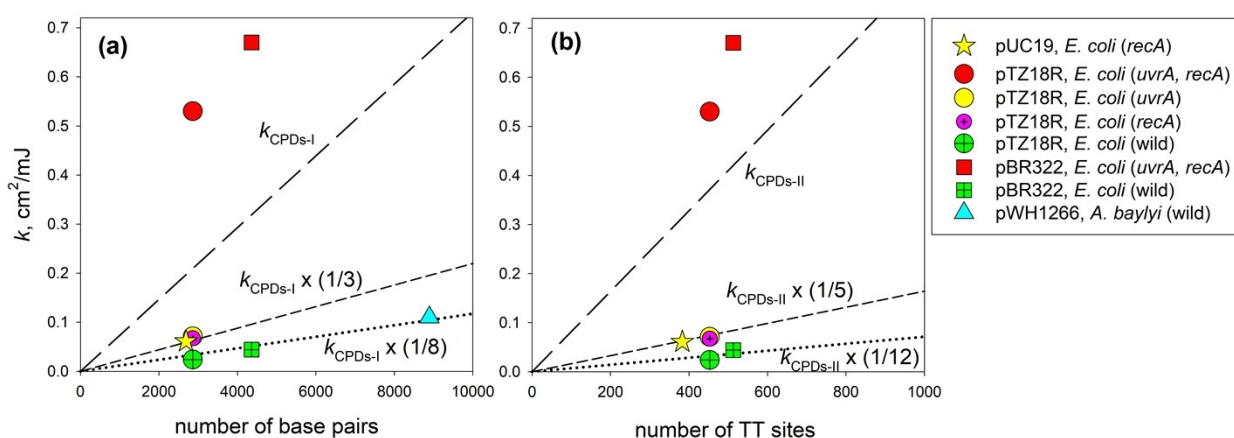

115

116 **Figure S6.** UV fluence-based rate constants ( $k$ ) for elimination of transforming activity of plasmids  
 117 as a function of number of (a) base pairs ( $k_{\text{CPDs-I}}$ ) and (b) TT sites ( $k_{\text{CPDs-II}}$ ). These figures are the same

as Figure 4 in the main manuscript except for that a  $\Phi_{\text{CPD}}$  value (3) of  $1.0 \times 10^{-3}$  was used to calculate the  $k_{\text{CPDs-I}}$  for Figure S6(a).

120

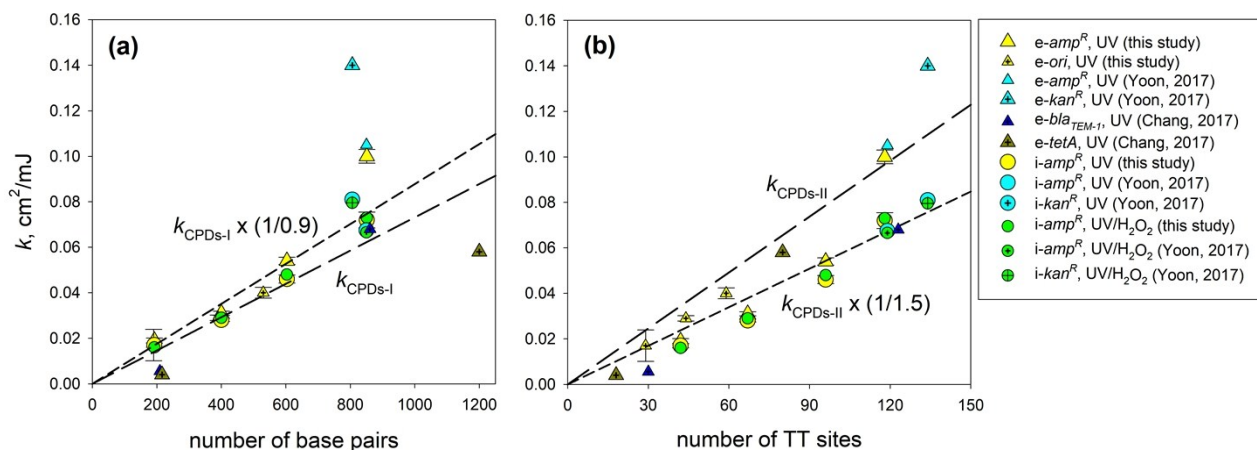

121

**Figure S7.** UV fluence-based rate constants ( $k$ ) for gene damage of extracellular (e-ARGs, triangles) and intracellular (i-ARGs, circles) plasmid-encoded genes as a function of number of (a) base pairs ( $k_{\text{CPD-I}}$ ) and (b) TT sites ( $k_{\text{CPD-II}}$ ). These figures are the same as Figure 5 in the main manuscript except for that a  $\Phi_{\text{CPD}}$  value (3) of  $1.0 \times 10^{-3}$  was used to calculate the  $k_{\text{CPDs-I}}$  for Figure S7(a).

126

127

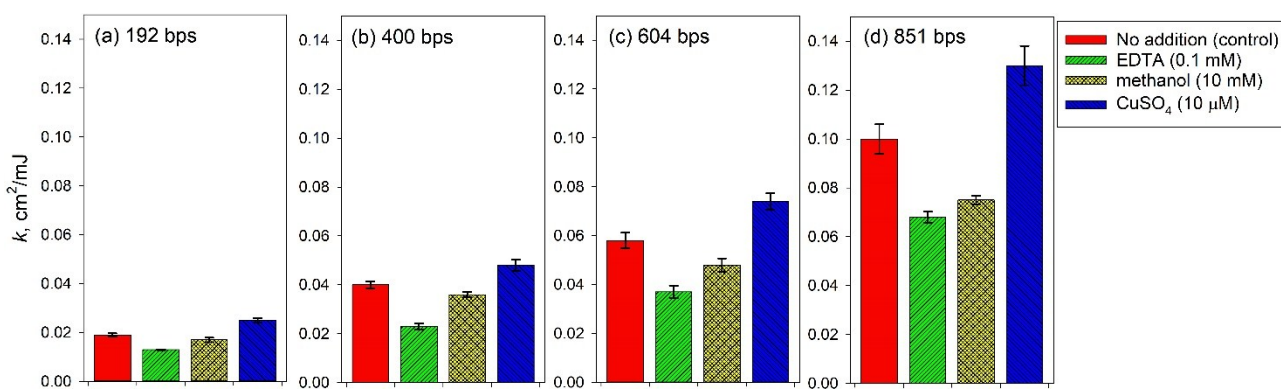

128

**Figure S8.** Effect of EDTA (chelator, 0.1 mM), methanol ( $\cdot\text{OH}$  scavenger, 10 mM), and Cu(II) (10  $\mu\text{M}$ ) on the degradation rate of *e-amp<sup>R</sup>* amplicons during UV treatment of pUC19 at pH 7 (2 mM phosphate buffer).

131

## References

1. Bader H, Sturzenegger V, Hoigne J. Photometric method for the determination of low concentrations of hydrogen peroxide by the peroxidase catalyzed oxidation of N, N-diethyl-p-phenylenediamine (DPD). *Water Research*. 1988;22(9):1109-15.
2. Schneider CA, Rasband WS, Eliceiri KW. NIH Image to ImageJ: 25 years of image analysis. *Nature Methods*. 2012;9:671.
3. Döuki T. Low ionic strength reduces cytosine photoreactivity in UVC-irradiated isolated DNA. *Photochemical & Photobiological Sciences*. 2006;5(11):1045-51.
